# Supplementary material
Source: Springer Nature journal article supplement (https://www.springermedizin.de/resource/supplementary/12885_2011_2863_MOESM11_ESM.pdf/9461938)

A

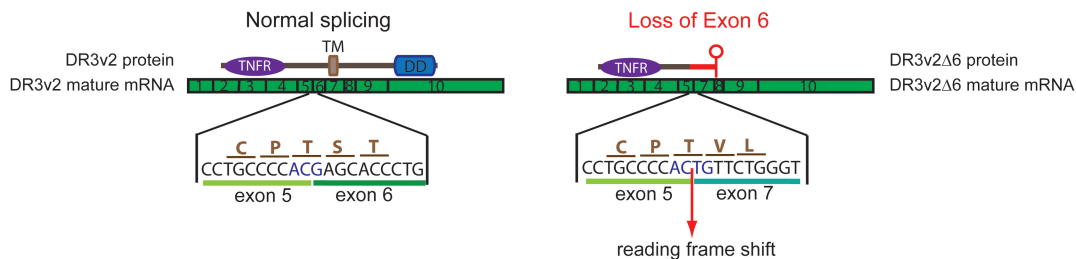

B

|         |             |              |            |            |             |            |            |            |     |
|---------|-------------|--------------|------------|------------|-------------|------------|------------|------------|-----|
| DR3v2   | NP_003781.1 | MEQRPRGCAA   | VAAALLLVLL | GARAQGGTRS | PRCDCAGDFH  | KKIGLFCCRG | CPAGHYLKAP | CTEPCGNSTC | 70  |
| DR3v2Δ6 |             | MEQRPRGCAA   | VAAALLLVLL | GARAQGGTRS | PRCDCAGDFH  | KKIGLFCCRG | CPAGHYLKAP | CTEPCGNSTC | 70  |
| DR3v2   | NP_003781.1 | LVCPQDTFLA   | WENHHNSECA | RCQACDEQAS | QVALENC SAV | ADTRCGCKPG | WFVECVQSQC | VSSSPFYCQP | 140 |
| DR3v2Δ6 |             | LVCPQDTFLA   | WENHHNSECA | RCQACDEQAS | QVALENC SAV | ADTRCGCKPG | WFVECVQSQC | VSSSPFYCQP | 140 |
| DR3v2   | NP_003781.1 | CLDCGALHRH   | TRLLCSRRDT | DCGTCLPGFY | EHGDGCVSCP  | TSTLGSCPER | CAAVCG---W | RQM-FWVQVL | 206 |
| DR3v2Δ6 |             | CLDCGALHRH   | TRLLCSRRDT | DCGTCLPGFY | EHGDGCVSCP  | T-VLG--PGA | PGWPCGPPAW | GHPDLHIPPL | 207 |
| DR3v2   | NP_003781.1 | LAGLVVPLLL   | GATLTYTYRH | CWPHKPLVTA | DEAGMEALTP  | PPATHLSPLD | SAHTLLAPPD | SSEKICTVQL | 276 |
| DR3v2Δ6 |             | LA-----      | -----      | -----      | -----       | -----      | -----      | -----      | 209 |
| DR3v2   | NP_003781.1 | VGNSWTPGY P  | ETQEALCPQV | TWSWDQLPSR | ALGPAAAPT L | SPESPAGSPA | MMLQPGPQLY | DVMDAVPARR | 346 |
| DR3v2Δ6 |             | ---SQAPGY--- | ---CR---   | -----      | -----       | -----      | -----      | -----      | 217 |
| DR3v2   | NP_003781.1 | WKEFVRTLGL   | REAEIEAVEV | EIGRFRDQY  | EMLKRWQQQ   | PAGLGAVYAA | LERMGLDGCV | EDLRSRLQRG | 416 |
| DR3v2Δ6 |             | -----        | -----      | -----      | -----       | -----      | -----      | -----      | 217 |

DR3v2 NP\_003781.1 P 417  
DR3v2Δ6 - 217

C

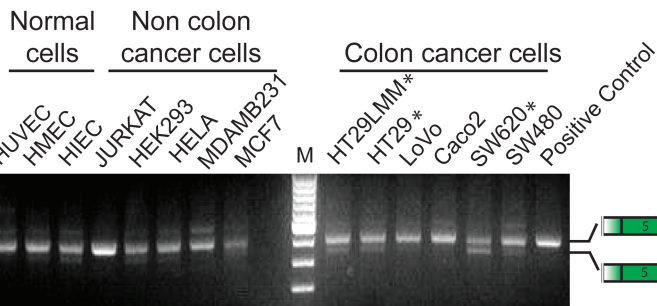

D

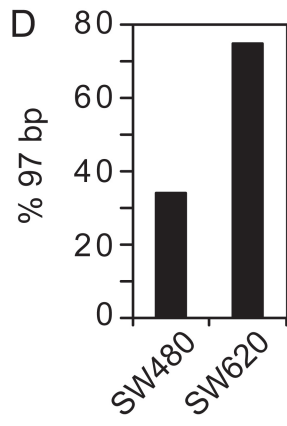

Supplement: MOESM11 [file 9461938]
